# Supplementary material for: Carbon dioxide activated carbon nanofibers with hierarchical micro-/mesoporosity towards electrocatalytic oxygen reduction
Source: Royal Society of Chemistry journal article supplement (doi:10.1039/c6ta00136j), 2016-01-01
Supplement: c6ta00136j1.pdf [file c6ta00136j1.pdf]

Supporting information

## Carbon Dioxide Activated Carbon Nanofibers with Hierarchical Micro-/Mesoporosity towards Electrocatalytic Oxygen Reduction

Yongfang Chen,<sup>a,b</sup> Qian Liu<sup>a\*</sup> and Jiacheng Wang<sup>a\*</sup>

<sup>a</sup>State Key Laboratory of High Performance Ceramics and Superfine Microstructure, Shanghai Institute of Ceramics, Chinese Academy of Sciences, 1295 Dingxi Road, Shanghai 200050, China.

Email: [jiacheng.wang@mail.sic.ac.cn](mailto:jiacheng.wang@mail.sic.ac.cn); [qianliu@sunm.shcnc.ac.cn](mailto:qianliu@sunm.shcnc.ac.cn)

<sup>b</sup>University of the Chinese Academy of Sciences, Beijing 100049, P. R. China.

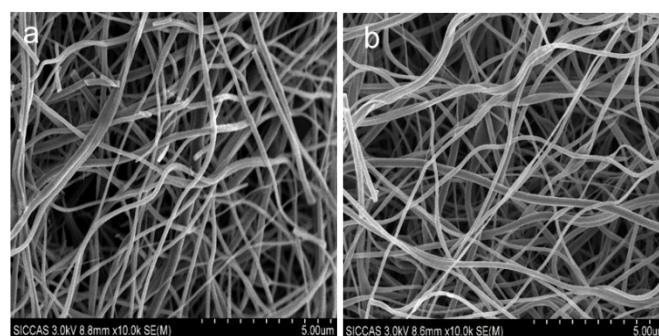

**Fig. S1** SEM of (a) CACNF-15 and (b) CACNF-30.

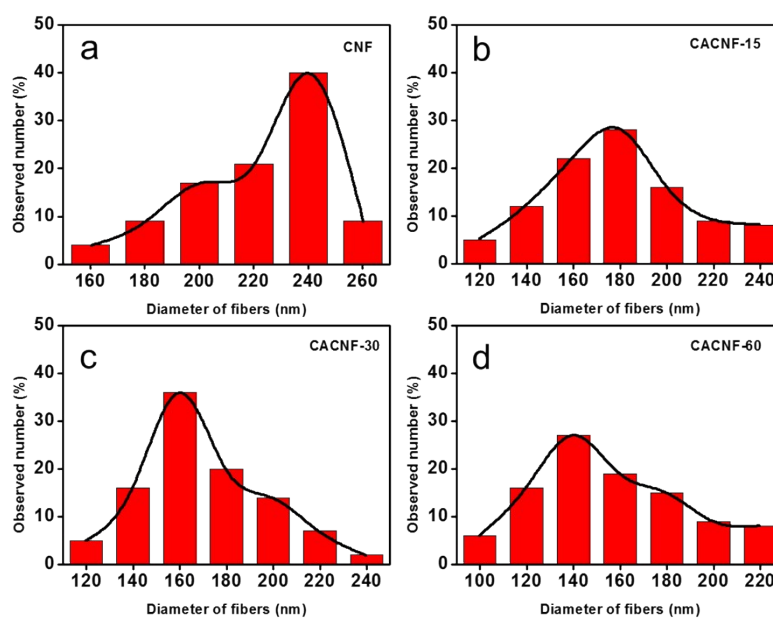

**Fig. S2** Diameter distribution curves of samples.

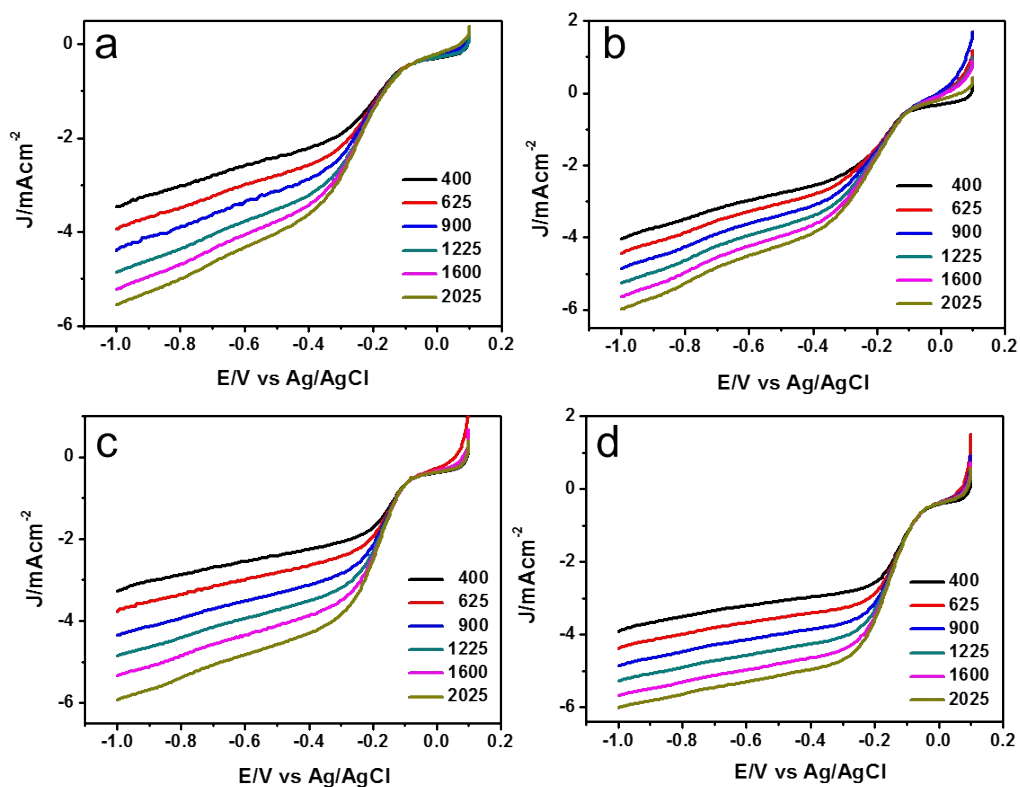

**Fig. S3** LSV curves of (a) CNF, (b) CACNF-15, (c) CACNF-30 and (d) CACNF-60 in  $O_2$ -saturated 0.1 M solution of KOH at a scan rate of  $10\text{ mV s}^{-1}$ .

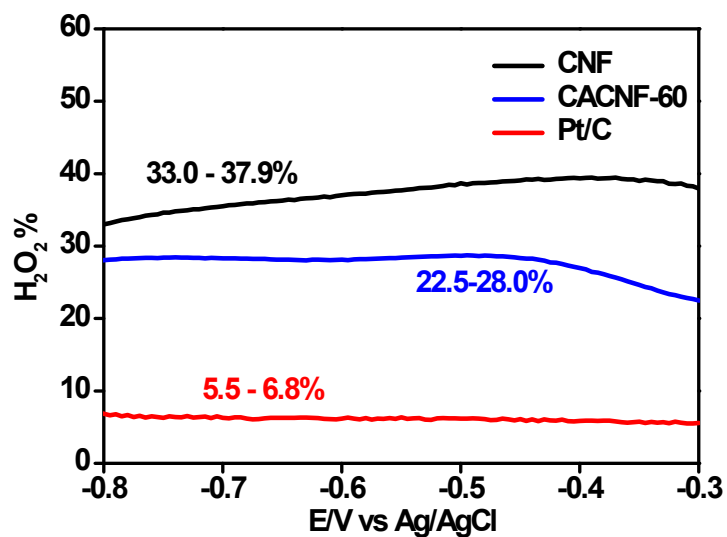

**Fig. S4**  $H_2O_2$  yield of CNF, CACNF-60 and commercial Pt/C.
